# Supplementary material
Source: HighWire-hosted journal article supplement (https://www.ajnr.org/highwire/filestream/52471/field_highwire_adjunct_files/0/3670_figures.pdf)
Supplement: 3670_figures.pdf [file 3670_figures.pdf]

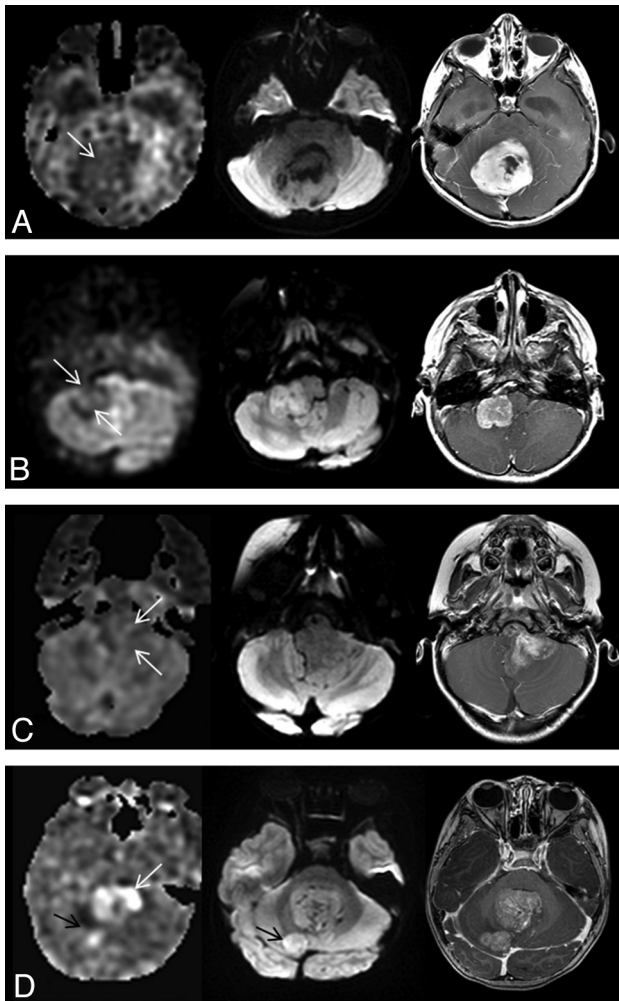

**ON-LINE FIGURE 1.** ASL perfusion (left) of various posterior fossa tumors and correlative axial isotropic diffusion tensor MR image (middle) and axial contrast-enhanced T1-weighted MR image (right). A, Low ASL signal (arrow) is seen in a 6-year-old boy with an enhancing pilocytic astrocytoma with a relatively high ADC range of  $1.5 \times 10^{-3} \text{ mm}^2/\text{s}$ . B, Low rTBF (arrows) is seen in a 2-year-old boy with choroid plexus papilloma that shows a relatively low mean ADC of  $0.6 \times 10^{-3} \text{ mm}^2/\text{s}$ . C, ASL signal within the tumor (arrows) is similar to the contralateral cerebellum in a 3-year-old boy with ependymoma, which shows a mean ADC of  $1.2 \times 10^{-3} \text{ mm}^2/\text{s}$ . D, Markedly high ASL signal (white arrow) and a relatively low mean ADC of  $0.6\text{--}0.7 \times 10^{-3} \text{ mm}^2/\text{s}$  is seen in a 3-year-old girl with medulloblastoma with intracranial seeding (black arrows; other brain regions not shown). The separate tumor nodule (black arrows) also shows a high ASL signal.

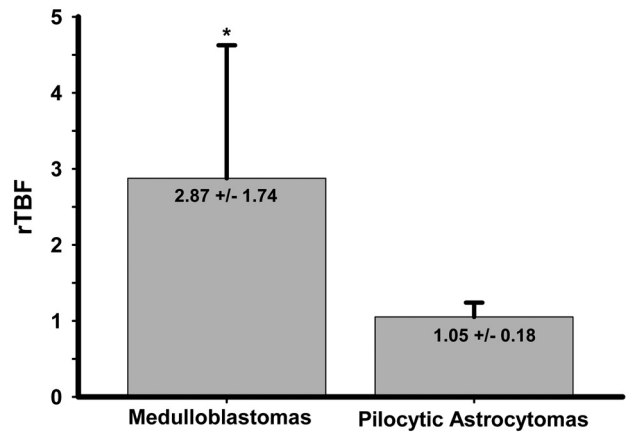

**ON-LINE FIGURE 2.** A bar graph showing comparison of posterior fossa medulloblastoma and pilocytic astrocytoma. Significantly higher mean rTBF (\*) is seen in medulloblastoma compared with pilocytic astrocytoma. The error bars represent standard deviation.
